# Supplementary material for: High resolution measurement of DUF1220 domain copy number from whole genome sequence data
Source: BMC Genomics. 2017 Aug 14;18:614. doi: 10.1186/s12864-017-3976-z (PMC5556342; doi:10.1186/s12864-017-3976-z)
Supplement: Supplementary file 1 — Supplementary Table S1. (PDF 98 kb) [file 12864_2017_3976_MOESM1_ESM.pdf]

**Table S1. Gene specific clade groups (n = 60)**

| <b>CON1<br/>(n = 14)</b>      | <b>CON2<br/>(n = 11)</b>      | <b>CON3<br/>(n = 11)</b>      | <b>HLS1<br/>(n = 7)</b>                  | <b>HLS2<br/>(n = 9)</b>                  | <b>HLS3<br/>(n = 8)</b>                             |
|-------------------------------|-------------------------------|-------------------------------|------------------------------------------|------------------------------------------|-----------------------------------------------------|
| Single Gene in Group          |                               |                               |                                          |                                          |                                                     |
| NBPF3                         | NBPF3                         | NBPF2P                        | NBPF9                                    | NBPF1L                                   | NBPF2P                                              |
| NBPF7                         | NBPF9                         | NBPF3                         | NBPF15                                   | NBPF2P                                   | NBPF9                                               |
| NBPF9                         | NBPF15                        | NBPF9                         | NBPF25P                                  | NBPF3                                    | NBPF13P                                             |
| NBPF13P                       | NBPF13P                       | NBPF15                        |                                          | NBPF9                                    | NBPF25P                                             |
| NBPF15                        | NBPF17P                       | NBPF17P                       |                                          | NBPF15                                   |                                                     |
| NBPF17P                       | NBPF20                        | NBPF20                        |                                          | NBPF17P                                  |                                                     |
| NBPF20                        | NBPF25P                       | NBPF25P                       |                                          |                                          |                                                     |
| NBPF21P                       |                               |                               |                                          |                                          |                                                     |
| NBPF25P                       |                               |                               |                                          |                                          |                                                     |
| Multiple Genes in Group       |                               |                               |                                          |                                          |                                                     |
| NBPF4,<br>NBPF5P,<br>NBPF6    |                               |                               |                                          |                                          |                                                     |
| NBPFF10,<br>NBPF14,<br>NBPF19 | NBPFF10,<br>NBPF14,<br>NBPF19 | NBPFF10,<br>NBPF14,<br>NBPF19 | NBPFF10,<br>NBPF14,<br>NBPF19,<br>NBPF20 | NBPFF10,<br>NBPF14,<br>NBPF19,<br>NBPF20 | NBPFF10,<br>NBPF14,<br>NBPF19,<br>NBPF20,<br>NBPF15 |
| NBPF1,<br>NBPF1L              | NBPF1,<br>NBPF1L              | NBPF1,<br>NBPF1L              | NBPF1,<br>NBPF1L                         |                                          | NBPF1,<br>NBPF1L                                    |
| NBPF8,<br>NBPF26              | NBPF8,<br>NBPF26              | NBPF8,<br>NBPF26              | NBPF8,<br>NBPF26                         | NBPF8,<br>NBPF26                         | NBPF8,<br>NBPF26                                    |
| NBPF11,<br>NBPF12             | NBPF11,<br>NBPF12             | NBPF11,<br>NBPF12             | NBPF11,<br>NBPF12                        | NBPF11,<br>NBPF12                        | NBPF11,<br>NBPF12                                   |
